# Supplementary material for: Similarity-Based Codes Sequentially Assigned to Ebolavirus Genomes Are Informative of Species Membership, Associated Outbreaks, and Transmission Chains
Source: PubMed Central journal article supplement — Open Forum Infect Dis. 2015 Feb 19;2(1):ofv024. doi: 10.1093/ofid/ofv024 (PMC4438903; doi:10.1093/ofid/ofv024), 2015-02-19
Supplement: supp_ofv024_ofv024supp_fig_caption.pdf [file supp_ofv024_ofv024supp_fig_caption.pdf]

**Supplementary Figure 1: Cladogram representation of a maximum likelihood phylogeny of ebolavirus genomes with LINs mapped to taxa**

Branch labels are non-parametric bootstrap support values as a percentage of 1200 bootstrap replicates. Branch lengths are not to scale, and the tree is rooted using midpoint rooting. Note that names of taxa are shortened GenBank definitions and not isolate names.
